# Supplementary material
Source: Springer Nature journal article supplement (https://www.springermedizin.de/resource/supplementary/12872_2011_427_MOESM3_ESM.pdf/9429964)

◆ PPV ≤ 11%    □ PPV > 11%

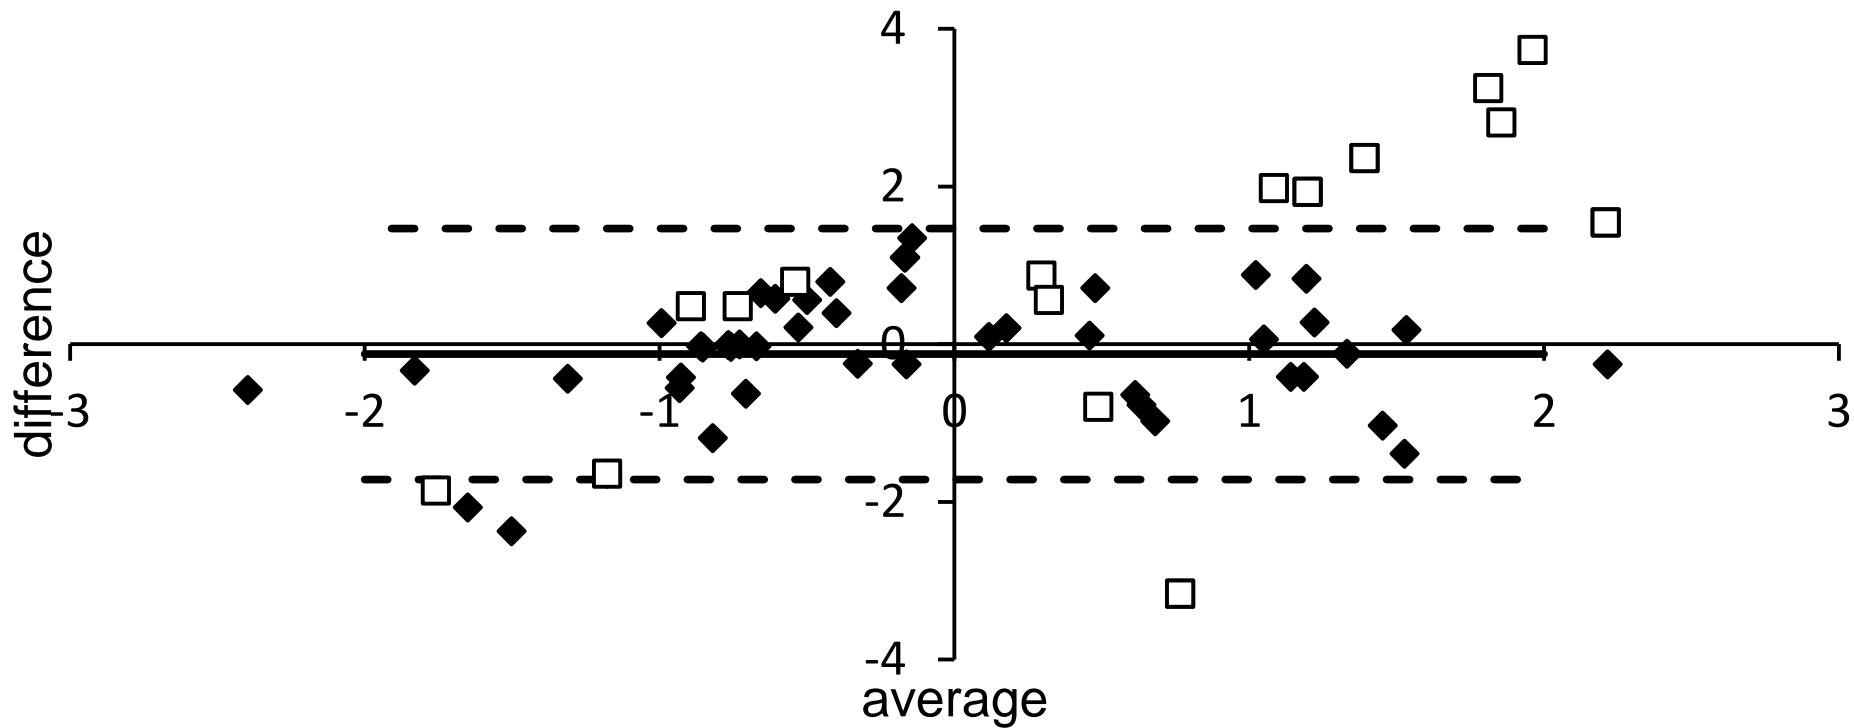

Supplement: MOESM3 [file 9429964]
